# Supplementary material for: Endothelial Transient Receptor Potential Canonical Channel Regulates Angiogenesis and Promotes Recovery After Myocardial Infarction
Source: PubMed Central journal article supplement — J Am Heart Assoc. 2022 Mar 5;11(6):e023678. doi: 10.1161/JAHA.121.023678 (PMC9075314; doi:10.1161/jaha.121.023678), 2022-03-05

## **SUPPLEMENTAL MATERIAL**

**Table S1: Sequences of siRNAs.**

|                  | siRNA sequence            |
|------------------|---------------------------|
| siTRPC1          | CAGCCAGAUUCCUAGCUUU       |
| siTRPC3          | GGAAGAACUGCUCUCCUCAUUGCAA |
| siTRPC4          | TCGAGGACCAGCATACATG       |
| siTRPC5          | CCAAUGGACUGAACCAGCUUUACUU |
| siTRPC5          | GGAGCUACCAUGUUUGGAATT     |
| siTRPC6          | TCGAGGACCAGCATACATG       |
| siHIF-1 $\alpha$ | AGTTCACCTGAGCCTAATA       |

**Table S2: Primers used in PCR.**

| Gene           |         | Sequence (5'-3')       |
|----------------|---------|------------------------|
| TRPC1          | Forward | AGCCTCTTGACAAACGAGGA   |
|                | Reverse | TCTTACAGGTGGGCTTACGG   |
| TRPC3          | Forward | GCCTTCATGTTTCGGTGCTC   |
|                | Reverse | GCGTTCTGGCCCATGTAGT    |
| TRPC4          | Forward | GGCGGACTCCAGGATTACATC  |
|                | Reverse | CCATGATTCCCGTGGGTTTCAG |
| TRPC5          | Forward | GGGCTGAGACTGAGCTGTC    |
|                | Reverse | TTGCGGATGGCGTAGAGTAAT  |
| TRPC6          | Forward | AGCCAGGACTATTTGCTGATGG |
|                | Reverse | AACCTTCTTCCCTTCTCACGA  |
| HIF-1 $\alpha$ | Forward | GCAGCAGGAATTGGAACATT   |
|                | Reverse | GCAGCAGGAATTGGAACATT   |
| NF-kBp65       | Forward | GGTCCACGGCGGACCGGT     |
|                | Reverse | GACCCCGAGAACGTGGTGCGC  |
| HNF4 $\alpha$  | Forward | AGCCAACGATCACCAAGCAA   |
|                | Reverse | ACTGGTCCCTCGTGTCACAT   |
| STAT3          | Forward | CCCATATCGTCTGAAACTC    |
|                | Reverse | TTGCTCCCTTCTGCTCT      |
| COX2           | Forward | CCGGGCCAGGGACTATTCAA   |
|                | Reverse | TGCAGACTTCGGTCAGTCCA   |

---

|       |         |                         |
|-------|---------|-------------------------|
| FOXO1 | Forward | TCGTCATAATCTGTCCCTACACA |
|       | Reverse | CGGCTTCGGCTCTTAGCAAA    |
| Smad3 | Forward | TGTGCGGCTCTACTACATCG    |
|       | Reverse | GCAGCAAATTCCTGGTTGTT    |
| Mef2c | Forward | TCCTGGTGTAACACATAGACCTC |
|       | Reverse | TGGTAAAGTAGGAGTTGCTACGG |
| GAPDH | Forward | AACTTTGGCATTGTGGAAGG    |
|       | Reverse | ACACATTGGGGGTAGGAACA    |

---

**Table S3: Potential HIF-1 $\alpha$  binding site on TRPC1 promoter.**

| <b>Score</b> | <b>Relative score</b> | <b>Start</b> | <b>End</b> | <b>Strand</b> | <b>Predicted site sequence</b> |
|--------------|-----------------------|--------------|------------|---------------|--------------------------------|
| 7.282        | 0.883145232692922     | 82           | 89         | 1             | CTGCGTGA                       |
| 5.502        | 0.830043481576361     | 415          | 422        | 1             | AGATGTGC                       |
| 5.290        | 0.82371900335349      | 649          | 656        | 1             | ACATGTGC                       |
| 5.827        | 0.839739026021801     | 977          | 984        | 1             | GGAGGTGC                       |
| 5.011        | 0.815395751352636     | 1880         | 1887       | 1             | AGACGCGC                       |

**Table S4: Primers for TRPC1 promoter construct.**

| Name         | Sequences                                             |
|--------------|-------------------------------------------------------|
| TRPC1-1MluIF | 5' <u>CGACGCGT</u> AGGTTTGAACAACCAGCACTCTTATCCACT-3'  |
| TRPC1-2MluIF | 5' <u>CGACGCGT</u> TTTGTTATAAACTTAGTTTGTGATGAAATCA-3' |
| TRPC1-3MluIF | 5' <u>CGACGCGT</u> TCCTCGGGAGTAAAGGGAGGAGAACATGAA-3'  |
| TRPC1-4MluIF | 5' <u>CGACGCGT</u> TAAAGTATGTAGGTATTGTTAGAATGTCCCA-3' |
| TRPC1-5MluIF | 5' <u>CGACGCGT</u> ATATACAAATGTATGGGCGCTCCTCTCTCC-3'  |
| TRPC1-6MluIF | 5' <u>CGACGCGT</u> TCCAAGATGCTAGGCGACCGACCAGAGAGGC-3' |
| TRPC1-XhoIR  | 5' <u>CCGCTCGAGAC</u> ACTAAATTTTATAGATGGCATATAAGTT-3' |

**Figure S1: Effect of siRNA treatment on the mRNA expression of corresponding TRP channels.** Scrambled siRNA and targeted siRNAs were added to mouse primary coronary artery endothelial cells. After 48 hours, RNA was extracted, and quantitative real time-polymerase chain reaction was performed to determine the mRNA level of corresponding TRP channels. One-way ANOVA and Dunnett's multiple comparison test,  $**P < 0.01$  versus ctl,  $n = 3$ . The data are presented as the mean  $\pm$  standard deviation.

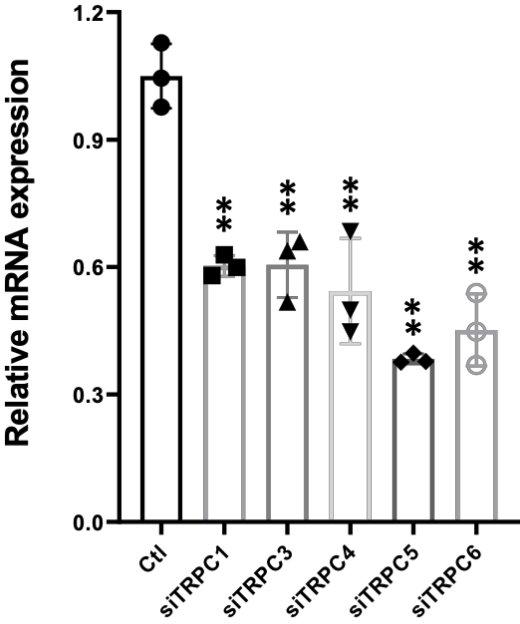

**Figure S2: Gene identification of WT and TRPC1<sub>EC</sub><sup>-/-</sup> mice.** PCR analysis of the genomic DNA from WT and TRPC1<sub>EC</sub><sup>-/-</sup> mice were performed by using two primer sequences (F1-R1, F2-R2) indicated by confirm insertion of the lox P sites. In the WT allele, 313-bp (F2-R2) fragment were amplified and in the TRPC1<sub>EC</sub><sup>-/-</sup> allele, 390-bp and 415-bp (F2-R2) fragments were amplified.

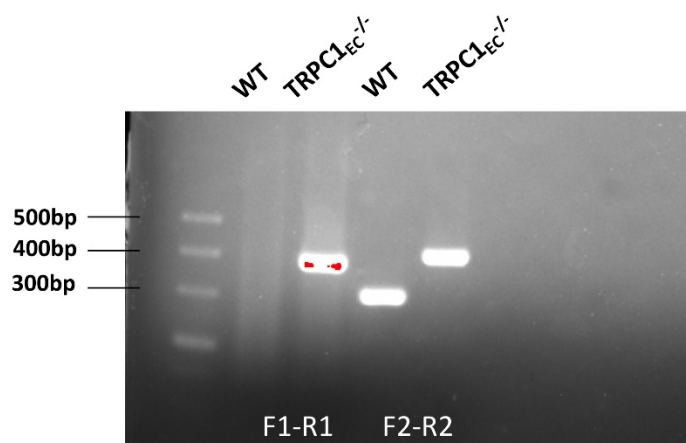



**Figure S3: Clarifications of TRPC1<sub>EC</sub><sup>-/-</sup> mice.** A, Relative mRNA levels of TRPC1 in heart, mesentery and aorta tissues from TRPC1<sup>fl/fl</sup> and TRPC1<sub>EC</sub><sup>-/-</sup> mice (n = 3; \**P* < 0.05 and \*\**P* < 0.01 vs TRPC1<sup>fl/fl</sup>, paired t test). B, Relative mRNA levels of TRPC1 in primary endothelial cells from TRPC1<sup>fl/fl</sup> and TRPC1<sub>EC</sub><sup>-/-</sup> mice (n = 3; \**P* < 0.05 and \*\**P* < 0.01 vs TRPC1<sup>fl/fl</sup>, paired t test). C, Representative immunofluorescence images for TRPC1 in coronary arteries, mesenteric arteries and aortas from TRPC1<sub>EC</sub><sup>-/-</sup> mice (yellow, CD31; red, TRPC1; blue, DAPI, scale bar, 10 μm).

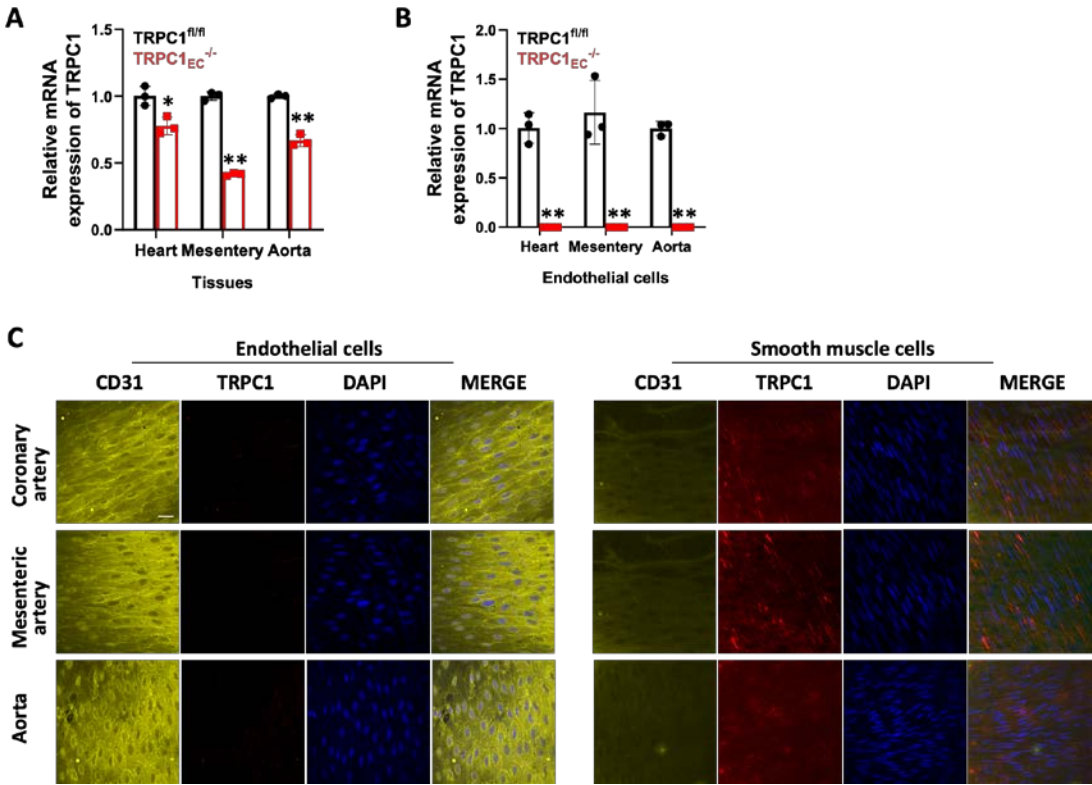

Supplement: JAH3-11-e023678-s001.pdf [file JAH3-11-e023678-s001.pdf]
